# Supplementary material for: Digital Disadvantage in Nutrition Services: How Environmental Literacy Gaps Limit Elderly Chinese with Chronic Diseases
Source: Research Square preprint supplement (doi:10.21203/rs.3.rs-6653933/v1), 2025-06-17
Supplement: Supplementary file 1 [file 5f780fd172461b70547ef197.docx]

**Appendix Table 1** Analysis of the correlations among SES, LEHLQ, and NRCDs in elderly individuals

|  | Social environmental support | | |  |
| --- | --- | --- | --- | --- |
|  | low | middle | high | Trend p-value |
| Model 1 | 0.00 | 0.83 (0.43-1.24) * | 1.94 (1.47-2.41) ** | <0.001 |
| Model 2 | 0.00 | 0.61 (0.19-1.02) * | 1.55 (1.06-2.03) ** | <0.001 |
| Model 3 | 0.00 | 0.60 (0.19-1.02) * | 1.55 (1.06-2.04) ** | <0.001 |

**Appendix Table 2** Analysis of the correlations among FES, LEHLQ, and NRCDs in elderly individuals

|  | Family environmental support | | |  |
| --- | --- | --- | --- | --- |
|  | low | middle | high | Trend p-value |
| Model 1 | 0.00 | 0.46 (0.05-0.87) * | 1.35 (0.82-1.88) ** | <0.001 |
| Model 2 | 0.00 | 0.42 (0.03-0.82) * | 1.22 (0.70-1.73) ** | <0.001 |
| Model 3 | 0.00 | 0.43 (0.04-0.83) * | 1.20 (0.69-1.72) ** | <0.001 |

**Appendix Table 3** Analysis of the correlations among OES, LEHLQ, and NRCDs in elderly individuals

|  | Online environmental support | | |  |
| --- | --- | --- | --- | --- |
|  | low | middle | high | Trend p-value |
| Model 1 | 0.00 | 0.22 (-0.21-0.66) | 0.83 (0.36-1.30) * | <0.001 |
| Model 2 | 0.00 | 0.26 (-0.17-0.69) | 0.59 (0.09-1.08) * | 0.004 |
| Model 3 | 0.00 | 0.26 (-0.17-0.69) | 0.61 (0.12-1.11) * | 0.003 |

**Appendix Table 4** Stratified analyses of NHSS subdimensions revealed differential associations with LEHLQ scores

| **Dimension** | **High-Support β (95% CI)** | **Middle-Support β (95% CI)** | **High vs Middle Δβ** |
| --- | --- | --- | --- |
| SES | 1.55** (1.06-2.04) | 0.60* (0.19-1.02) | +0.95** |
| FES | 1.20** (0.69-1.72) | 0.43* (0.04-0.83) | +0.77** |
| OES | 0.61* (0.12-1.11) | 0.26 (-0.17-0.69) | +0.35 |
