# Supplementary material for: Digital Disadvantage in Nutrition Services: How Environmental Literacy Gaps Limit Elderly Chinese with Chronic Diseases
Source: Research Square preprint supplement (doi:10.21203/rs.3.rs-6653933/v1), 2025-06-17
Supplement: Supplementary file 2 [file d3b091dedf6e8376df773a6c.docx]

# Chongqing Older adults Nutrition Support and Environmental Health Literacy Survey

Questionnaire Code: ____________________ Investigator: ____________________

Survey Location: ____________________ Survey Date: ____________________

## Section I: Basic Personal Information

1. Your date of birth (Gregorian calendar): ______ Year ______ Month (If under 60 years old, end the survey)

2. Your gender: ☐ Male ☐ Female

3. Your ethnicity: ☐ Han ☐ Other (please specify): ____________

4. Your most recent height and weight measurements (e.g., 160.0 cm, 45 kg): Height: ______ cm Weight: ______ kg

5. Your place of residence: ☐ Urban ☐ Rural

6. Your highest level of education: ☐ Elementary or below ☐ Middle School ☐ High School/Vocational/Technical School ☐ Associate Degree/Bachelor's or higher

7. Your primary occupation before retirement: ☐ Healthcare Institution ☐ Education Sector ☐ Business/Service Industry ☐ Industry/Manufacturing ☐ Government/Public Institution ☐ Agriculture/Forestry/Animal Husbandry/Fisheries ☐ Other (please specify): _______________

8. Your marital status: ☐ Married ☐ Divorced ☐ Widowed ☐ Single

9. Your average monthly income (including support from children) in RMB: ☐ <1000 ☐ 1001–3000 ☐ 3001–5000 ☐ ≥5001

10. Do you live in a nursing facility? ☐ Yes ☐ No

11. Who do you currently live with? (Select all that apply): ☐ Alone (If selected, no other option can be selected) ☐ Spouse ☐ Children ☐ Grandchildren ☐ Friends ☐ Others (please specify): _______________

12. How often do you drink alcohol? ☐ Daily ☐ Weekly ☐ Rarely ☐ Quit ☐ Never

13. How often do you smoke? ☐ More than 5 cigarettes/day ☐ 5 cigarettes/day or less ☐ More than once a week but not daily ☐ Less than once a week ☐ Quit smoking ☐ Never smoked

## Section II: Health Status

1. Compared to your peers, how would you rate your overall health in the past year? ☐ Very Poor ☐ Poor ☐ Average ☐ Good ☐ Very Good

2. Number of health checkups you had in 2022: ☐ Never since retirement ☐ None in 2022 ☐ Once ☐ Twice ☐ More than twice

3. Do you have any chronic non-communicable diseases? ☐ Yes ☐ Not sure ☐ No (If “Not sure” or “No,” skip to Q6)

4. Number of chronic conditions diagnosed: ☐ 1 ☐ 2–3 ☐ More than 3

5. Which chronic conditions have you been diagnosed with? (Select all that apply):

☐ Hypertension ☐ Diabetes ☐ Hyperlipidemia ☐ Chronic Obstructive Pulmonary Disease (COPD)

☐ Coronary Heart Disease ☐ Stroke ☐ Cancer ☐ Osteoporosis

☐ Bronchial Asthma ☐ Chronic Bronchitis ☐ Other (please specify): _______________

6. How long ago were you first diagnosed with a chronic condition? ☐ <1 year ☐ 1–5 years ☐ 5–10 years ☐ ≥10 years

7. Do you usually learn about nutrition and health knowledge? ☐ Yes ☐ No (If No, skip to Section III)

8. Through which channels do you acquire nutrition and health knowledge? (Select all that apply):

☐ New media with images and text (e.g., WeChat, Weibo) ☐ Video-based platforms (e.g., TikTok, Kuaishou)

☐ Website searches ☐ TV, radio ☐ Books, newspapers, magazines, journals

☐ Family, relatives, friends ☐ Hospitals, community health service stations, village clinics ☐ Other (please specify): _______________

## Section III: Nutrition Health Service Support

1. Attention check item – please select 'Does not match' ☐ Completely does not match ☐ Completely matches ☐ Does not match ☐ Matches

(1) Social Environment

| **Statement** | **Strongly Disagree** | **Disagree** | **Neutral** | **Agree** | **Strongly Agree** |
| --- | --- | --- | --- | --- | --- |
| Medical staff in my community or hospital have provided me with nutrition counseling. | ☐ | ☐ | ☐ | ☐ | ☐ |
| There are facilities near my home that provide nutritional counseling (e.g., wellness centers, nutrition departments). | ☐ | ☐ | ☐ | ☐ | ☐ |
| My community/area has conducted nutrition and health-related educational campaigns (e.g., lectures, exhibitions). | ☐ | ☐ | ☐ | ☐ | ☐ |

(2) Family Environment

| **Statement** | **Strongly Disagree** | **Disagree** | **Neutral** | **Agree** | **Strongly Agree** |
| --- | --- | --- | --- | --- | --- |
| People important to me (e.g., family, partner) hope/support me in managing my nutrition and health. | ☐ | ☐ | ☐ | ☐ | ☐ |
| My family believes nutrition and health management benefits my well-being. | ☐ | ☐ | ☐ | ☐ | ☐ |
| My family/caregivers help me plan a healthy diet. | ☐ | ☐ | ☐ | ☐ | ☐ |

(3) Online Environment

1. Do you own smart devices (e.g., smartphone, tablet, smart speaker)? ☐ Yes ☐ No (If “No,” skip to item 3 in this section)

| **Statement** | **Strongly Disagree** | **Disagree** | **Neutral** | **Agree** | **Strongly Agree** |
| --- | --- | --- | --- | --- | --- |
| I can use smart devices proficiently. | ☐ | ☐ | ☐ | ☐ | ☐ |
| Using smart devices provides me with the latest nutrition and health information. | ☐ | ☐ | ☐ | ☐ | ☐ |
| I can easily access nutrition and health knowledge online. | ☐ | ☐ | ☐ | ☐ | ☐ |
| Online nutrition and health information is of high quality. | ☐ | ☐ | ☐ | ☐ | ☐ |

## Section IV: The Level of Environmental and Health Literacy Questionnaire (LEHLQ)

| **Statement** | **Strongly Disagree** | **Disagree** | **Neutral** | **Agree** | **Strongly Agree** |
| --- | --- | --- | --- | --- | --- |
| A balanced intake of grains, vegetables, fruits, and poultry is essential. | ☐ | ☐ | ☐ | ☐ | ☐ |
| Elderly people should consume dairy products (e.g., milk, yogurt, senior formula). | ☐ | ☐ | ☐ | ☐ | ☐ |
| Diabetic individuals should prioritize whole grains and foods with a low glycemic index. | ☐ | ☐ | ☐ | ☐ | ☐ |
| People with high cholesterol do not need to reduce intake of high-cholesterol foods like organ meats, egg yolks, and shrimp. | ☐ | ☐ | ☐ | ☐ | ☐ |
| The occurrence of hypertension has nothing to do with salt intake. | ☐ | ☐ | ☐ | ☐ | ☐ |

## Section V: Frequency of Participation in Nutrition and Health Activities

1. In the past year, how often have you actively participated in nutrition and health education activities organized by the community or institutions?

☐ 1–3 times ☐ 3–5 times ☐ 5–7 times ☐ More than 7 times ☐ Never

2. In the past year, how often have you sought nutritional advice or counseling (online or offline)?

☐ 1–3 times ☐ 3–5 times ☐ 5–7 times ☐ More than 7 times ☐ Never

3. I regularly and actively monitor my health status (e.g., weight, blood pressure, blood glucose).

☐ Strongly Disagree ☐ Disagree ☐ Neutral ☐ Agree ☐ Strongly Agree
